# Supplementary material
Source: Springer Nature journal article supplement (https://www.springermedizin.de/resource/supplementary/12874_2013_1034_MOESM1_ESM.pdf/9433316)

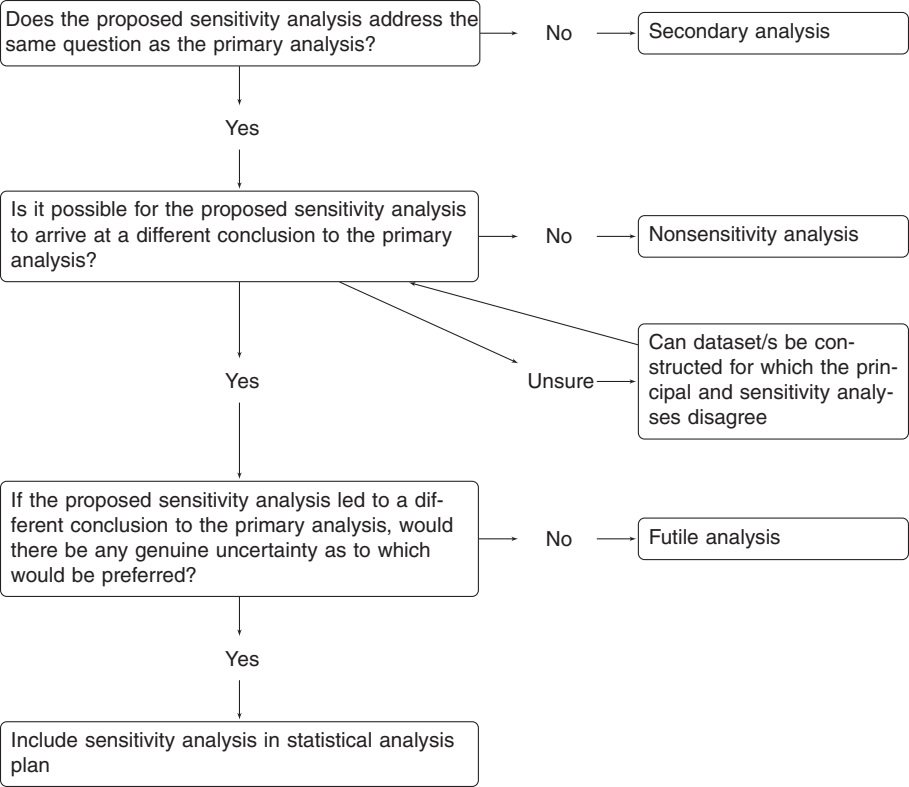

Supplement: MOESM1 [file 9433316]
